# Supplementary material for: Sesame as an Alternative Host Plant to Establish and Retain Predatory Mirids in Open-Field Tomatoes
Source: MDPI journal article supplement (doi:10.3390/plants11202779), 2022-10-20

## A: Cage Study Treatments

|                                                    |                                               |                                                       |
|----------------------------------------------------|-----------------------------------------------|-------------------------------------------------------|
| 1. <i>B. tabaci</i> + <i>N. tenuis</i><br>4 plants | 2. <i>B. tabaci</i> + Insecticide<br>4 plants | 3. <i>B. tabaci</i> + Untreated<br>Tomato<br>4 plants |
|----------------------------------------------------|-----------------------------------------------|-------------------------------------------------------|

## B: *B. tabaci* (Eggs + Nymphs)

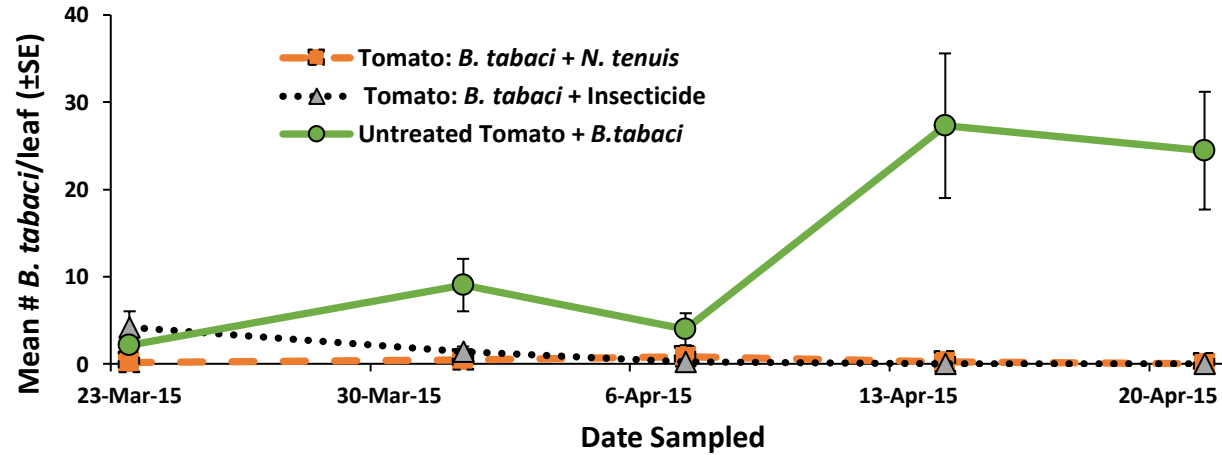

## C: Cage Study *N. tenuis* (Adults+ Nymphs) and Damage (Necrotic Rings)

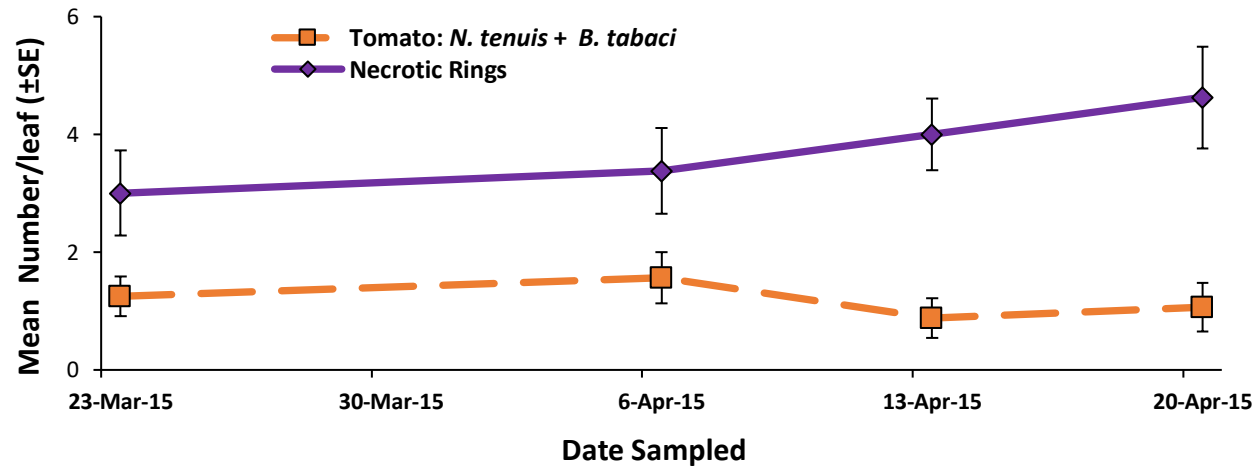

Supplement: s1 [file s1]
